# Supplementary material for: National trends in emergency readmission rates: a longitudinal analysis of administrative data for England between 2006 and 2016
Source: PubMed Central journal article supplement — BMJ Open. 2018 Mar 12;8(3):e020325. doi: 10.1136/bmjopen-2017-020325 (PMC5857687; doi:10.1136/bmjopen-2017-020325), 2018-03-12
Supplement: bmjopen-2017-020325supp001.pdf [file bmjopen-2017-020325supp001.pdf]

Appendix A: List of ICD-10 codes and OPSC-4 codes used for subgroup analyses

| Condition                             | ICD-10                                                                                                        | OPCS-4                                                                                                                                                                                                                                                                                                                                                                                                                                                          |
|---------------------------------------|---------------------------------------------------------------------------------------------------------------|-----------------------------------------------------------------------------------------------------------------------------------------------------------------------------------------------------------------------------------------------------------------------------------------------------------------------------------------------------------------------------------------------------------------------------------------------------------------|
| Acute Myocardial Infarction           | I21, I210, I211, I212, I213, I214, I219<br>I22, I220, I221, I228, I229                                        | -<br>-                                                                                                                                                                                                                                                                                                                                                                                                                                                          |
| Stroke                                | I60, I61, I62, I63, I64                                                                                       | -                                                                                                                                                                                                                                                                                                                                                                                                                                                               |
| Pneumonia                             | J12, J13, J14, J15, J16, J17, J18                                                                             | -                                                                                                                                                                                                                                                                                                                                                                                                                                                               |
| Chronic Obstructive Pulmonary Disease | I278, I279, J40, J41, J42, J43, J44, J45, J46,<br>J47, J61, J62, J63, J64, J65, J66, J67, J684,<br>J701, J703 | -<br>-<br>-                                                                                                                                                                                                                                                                                                                                                                                                                                                     |
| Heart failure                         | I110, I130, I132, I50, I501, I509, J81X                                                                       | -                                                                                                                                                                                                                                                                                                                                                                                                                                                               |
| Diabetes                              | E10, E11, E12, E13, E14                                                                                       | -                                                                                                                                                                                                                                                                                                                                                                                                                                                               |
| Hip and knee replacement              | -<br>-<br>-<br>-<br>-<br>-<br>-                                                                               | W371 W378 W379 W381 W388 W389 W391 W398 W399 W461 W468 W469 W471<br>W478 W479 W481 W488 W489 W931 W938 W939 W941 W948 W949 W951 W958<br>W959 W521 W528 W529 W531 W538 W539 W541 W548 W371 W378 W379 W381<br>W388 W389 W391 W398 W399 W521 W528 W529 W531 W538 W539 W541 W548<br>W549 O181 O188 O189 W400 W402 W403 W404 W410 W412 W413 W414 W420<br>W422 W423 W581 W582 W424 W425 W426 W520 W522 W523 W530 W532 W533<br>W540 W542 W543 W544 O180 O182 O183 O184 |
| Cholecystectomy                       | -                                                                                                             | J18                                                                                                                                                                                                                                                                                                                                                                                                                                                             |
| Hysterectomy                          | -                                                                                                             | Q07                                                                                                                                                                                                                                                                                                                                                                                                                                                             |
