# Supplementary material for: National trends in emergency readmission rates: a longitudinal analysis of administrative data for England between 2006 and 2016
Source: PubMed Central journal article supplement — BMJ Open. 2018 Mar 12;8(3):e020325. doi: 10.1136/bmjopen-2017-020325 (PMC5857687; doi:10.1136/bmjopen-2017-020325), 2018-03-12
Supplement: bmjopen-2017-020325supp002.pdf [file bmjopen-2017-020325supp002.pdf]

Appendix B: Computation formula for calculating the systematic component of variation

$$SCV = \left[ \frac{\sum_i \frac{(OR_i - ER_i)^2}{ER_i^2} - \frac{\sum_i \frac{1}{ER_i}}{n-1}}{n-1} \right] \times 100$$
