# Supplementary material for: National trends in emergency readmission rates: a longitudinal analysis of administrative data for England between 2006 and 2016
Source: PubMed Central journal article supplement — BMJ Open. 2018 Mar 12;8(3):e020325. doi: 10.1136/bmjopen-2017-020325 (PMC5857687; doi:10.1136/bmjopen-2017-020325), 2018-03-12
Supplement: bmjopen-2017-020325supp003.pdf [file bmjopen-2017-020325supp003.pdf]

## Appendix C: Ordinary least squares regression analysis

| <i>30-day emergency readmission rates (risk-adj)</i> |             |           |              |
|------------------------------------------------------|-------------|-----------|--------------|
| Variable                                             | Coefficient | Std. Err. | t-statistics |
| Constant                                             | 6.56***     | 0.08      | 80.95        |
| FY 2006/07                                           |             | Baseline  |              |
| FY 2007/08                                           | -0.23 **    | 0.11      | -2.05        |
| FY 2008/09                                           | 0.03        | 0.11      | 0.32         |
| FY 2009/10                                           | 0.13        | 0.10      | 1.20         |
| FY 2010/11                                           | 0.21**      | 0.10      | 1.95         |
| FY 2011/12                                           | 0.10        | 0.10      | 0.96         |
| FY 2012/13                                           | 0.20*       | 0.10      | 1.88         |
| FY 2013/14                                           | 0.12        | 0.10      | 1.13         |
| FY 2014/15                                           | 0.09        | 0.10      | 0.89         |
| FY 2015/16                                           | 0.08        | 0.10      | 0.75         |
| N                                                    | 1446        |           |              |
| R-squared                                            | 0.01        |           |              |

Note: \*\*\* indicates that the variable has robust impact on dependent variable at 1% significance level, \*\* for 5% and \* for 10%.
