# Supplementary material for: National trends in emergency readmission rates: a longitudinal analysis of administrative data for England between 2006 and 2016
Source: PubMed Central journal article supplement — BMJ Open. 2018 Mar 12;8(3):e020325. doi: 10.1136/bmjopen-2017-020325 (PMC5857687; doi:10.1136/bmjopen-2017-020325), 2018-03-12
Supplement: bmjopen-2017-020325supp004.pdf [file bmjopen-2017-020325supp004.pdf]

Appendix D: Sensitivity analysis for 7-day and 90-day emergency readmission rates

|                                                      | FY 2006/07                      |                         |            | FY 2015/16                      |                         |            |
|------------------------------------------------------|---------------------------------|-------------------------|------------|---------------------------------|-------------------------|------------|
|                                                      | <i>No of indexed admissions</i> | <i>Mean (Std. Dev.)</i> | <i>SCV</i> | <i>No of indexed admissions</i> | <i>Mean (Std. Dev.)</i> | <i>SCV</i> |
| 7-day emergency readmission (any indexed admission)  | 5 728 882                       | 3.20 (0.56)             | 31.11      | 7 123 792                       | 3.37 (0.58)             | 29.27      |
| 30-day emergency readmission (any indexed admission) | 5 204 263                       | 6.50 (0.95)             | 15.60      | 6 219 153                       | 6.73 (0.93)             | 14.58      |
| 90-day emergency readmission (any indexed admission) | 4 597 361                       | 9.99 (1.33)             | 10.42      | 5 088 164                       | 9.78 (1.22)             | 9.85       |

**Note:** Crude readmission rates weighted by the number of indexed admissions per trust.
